# Supplementary material
Source: Elsevier journal article supplement (https://www.sciencedirect.com/science/article/pii/S0212656714003886)
Supplement: mmc1 [file S0212656714003886:mmc1.doc]

**Esquema del estudio:**

Fase cualitativa:

Búsqueda bibliográfica

Metodología Metaplan para selección de variables

Grupos focales (3) para obtención de nuevas variables

Desarrollo del cuestionario

Validación del cuestionario: 8 entrevistas cognitivas, 50 entrevistas

Fase cuantitativa:

Establecimiento de la muestra (400)

Administración del cuestionario (484)

Pérdidas (0)

Análisis de resultados: SPSS V.15

**Establecimiento y selección de la muestra**


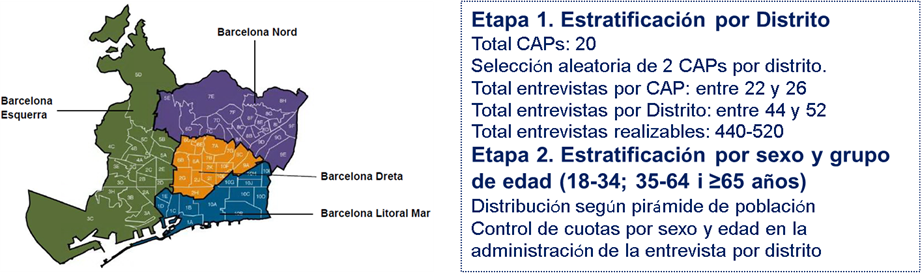


**Etapa 1. Estratificación por Distrito**

Total CAPs: 20

Selección aleatoria de 2 CAPs por Distrito

Total entrevistas/CAP: 22-26

Total entrevistas/Distrito: 44-52

Total entrevistas realizables: 440-520

**Etapa 2. Estratificación por sexo y grupo de edad (18-34; 35-64; ≥65 años)**

Distribución según pirámide de población. Control de cuotas por sexo y edad en la administración de la entrevista por distrito.
